# Supplementary material for: A new potential nonlinear optical hybrid semi-organic crystal of ZnMnCl4(TPPO)4 with attractive physical properties
Source: Royal Society of Chemistry journal article supplement (doi:10.1039/c5ce02002f), 2016-01-01
Supplement: c5ce02002f1.pdf [file c5ce02002f1.pdf]

**Electronic Supplementary Information:**

**New Potential Nonlinear Optical Hybrid Semi-Organic  
Crystal of  $\text{ZnMnCl}_2(\text{TPPO})_4$  with attractive physical  
properties**

Xiaolong Liu, Guangqiang Wang, Yangyang Dang, Shaojun Zhang, Hanlin Tian, Yan Ren\* and Xutang Tao\*

State Key Laboratory of Crystal Materials, Shandong University, Jinan, 250100, China.

E-mail: txt@sdu.edu.cn; ry@sdu.edu.cn.

Fax: +86-531-88574135, Tel: +86-531-88364963

**The Captions for ESI**

**Fig. S1** The simulated appearance of crystal and the determined facets.

**Fig. S2** The photograph of the growing  $\text{MnZnCl}_4(\text{TPPO})_4$  crystal.

**Fig. S3** The UV-vis Spectrum of  $\text{ZnCl}_2(\text{TPPO})_2$ .

**Table S1** Crystal data and structure refinements for  $\text{ZnCl}_2(\text{TPPO})_2$

**Table S2** XRF- SQX calculation of  $\text{MnZnCl}_4(\text{TPPO})_4$ .

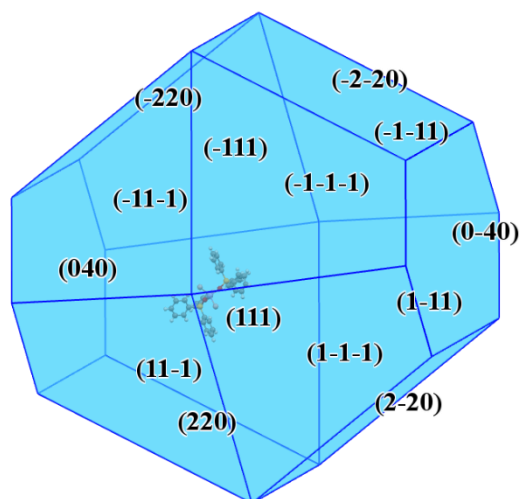

**Fig. S1** The simulated appearance of crystal and the determined facets

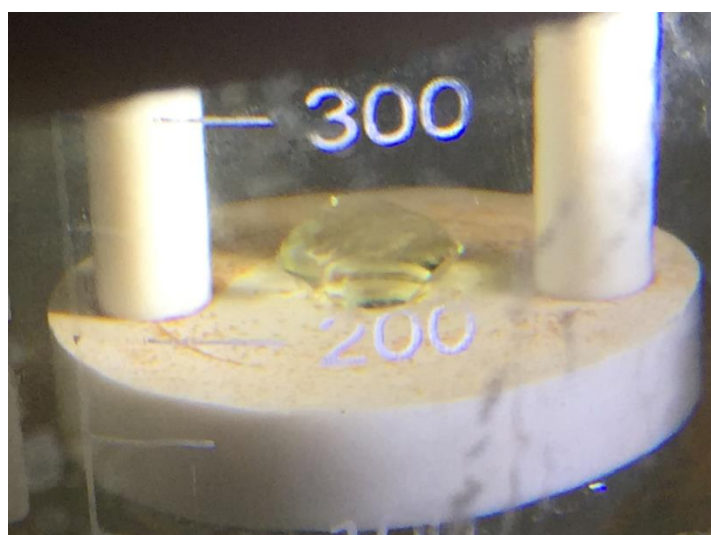

**Fig. S2** The photograph of the growing  $\text{ZnMnCl}_4$  (TPPO) $_4$  crystal.

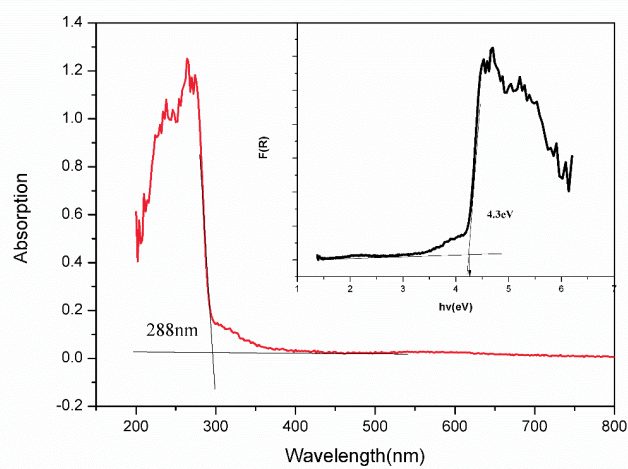

**Fig. S3** The UV-vis Spectrum of  $\text{ZnCl}_2$  (TPPO) $_2$  powder.

**Table S1 Crystal data and structure refinements for ZnCl<sub>2</sub> (TPPO)<sub>2</sub>**

|                                           |                                                                                 |
|-------------------------------------------|---------------------------------------------------------------------------------|
| Empirical formula                         | ZnCl <sub>2</sub> C <sub>36</sub> H <sub>30</sub> P <sub>2</sub> O <sub>2</sub> |
| Formula weight/g·mol <sup>-1</sup>        | 692.83                                                                          |
| Cell setting                              | Orthorhombic                                                                    |
| Space group                               | <i>Fdd2</i>                                                                     |
| <i>a</i> /Å                               | 20.718(5)                                                                       |
| <i>b</i> /Å                               | 33.018(5)                                                                       |
| <i>c</i> /Å                               | 9.751(5)                                                                        |
| $\alpha$ /°                               | 90                                                                              |
| $\beta$ /°                                | 90                                                                              |
| $\gamma$ /°                               | 90                                                                              |
| Volume / Å <sup>3</sup>                   | 6670(4)                                                                         |
| Z                                         | 8                                                                               |
| Measurement temperature                   | 293(2)                                                                          |
| Crystal color                             | colorless                                                                       |
| Crystal size (mm <sup>3</sup> )           | 0.03×0.03×0.04                                                                  |
| Absolute structure parameter              | 0.015(7)                                                                        |
| F (000)                                   | 2848                                                                            |
| Radiation wavelength /Å                   | 0.71073                                                                         |
| D <sub>calc</sub> d (g·cm <sup>-3</sup> ) | 1.380                                                                           |
| Limiting indices                          | -26<= <i>h</i> <=26, -42<= <i>k</i> <=42, -12<= <i>l</i> <=12                   |
| Reflections collected / unique            | 18771 / 3797 [R(int) = 0.0198]                                                  |
| $\mu$ (mm <sup>-1</sup> )                 | 1.024                                                                           |
| $\theta$ range (°)                        | 2.32 ~27.55                                                                     |
| Data / restraints / parameters            | 3797 / 1 / 196                                                                  |
| Gof                                       | 1.052                                                                           |
| R1, wR2 [I >2 $\sigma$ (I)]               | R1 = 0.0203, wR2 = 0.0555                                                       |
| R1, wR2 (all data)                        | R1 = 0.0214, wR2 = 0.0559                                                       |
| Extinction coefficient                    | 0.00021(5)                                                                      |
| Min/Max $\Delta\rho$ /eÅ <sup>-3</sup>    | -0.191/ 0.230                                                                   |

<sup>a</sup>w = 1/[s<sup>2</sup>(Fo<sup>2</sup>)+( 0.0361P)<sup>2</sup>+0.000P], where P = (Fo<sup>2</sup>+2Fc<sup>2</sup>)/3.

---

**Table S2 XRF- SQX calculation of MnZnCl<sub>4</sub>(TPPO)<sub>4</sub>**

---

| Component | Result<br>(mass %) | Limit of<br>detection | Elements<br>line | Intensity | w/o     |
|-----------|--------------------|-----------------------|------------------|-----------|---------|
| C         | 51.1               | 0.20519               | C-KA             | 2.3106    | 30.3435 |
| P         | 25.2               | 0.01973               | P-KA             | 89.9980   | 14.9580 |
| Mn        | 9.94               | 0.00712               | Mn-KA            | 32.5832   | 5.9055  |
| Zn        | 13.8               | 0.00533               | Zn-KA            | 115.0305  | 8.2268  |

---
